# Supplementary material
Source: PubMed Central journal article supplement (PMC6937382)
Supplement: NIHMS1035631-supplement-1.pdf [file NIHMS1035631-supplement-1.pdf]

PRACTICE QUALITY AS MECHANISM

Supplemental Materials Table 1. Sample demographics and descriptive statistics

| Variable                           | Valid n | Mean   | SD    | Min   | Max   | Skew  | Kurtosis | n  | %    |
|------------------------------------|---------|--------|-------|-------|-------|-------|----------|----|------|
| <b>Age</b>                         | 88      | 47.61  | 12.72 | 20    | 85    | 0.16  | -0.48    |    |      |
| <b>Gender</b>                      | 88      |        |       |       |       |       |          |    |      |
| Female                             |         |        |       |       |       |       |          | 68 | 77.3 |
| Male                               |         |        |       |       |       |       |          | 20 | 22.7 |
| <b>Race/ethnicity</b>              | 88      |        |       |       |       |       |          |    |      |
| African American                   |         |        |       |       |       |       |          | 1  | 1.1  |
| Asian American                     |         |        |       |       |       |       |          | 1  | 1.1  |
| Latino                             |         |        |       |       |       |       |          | 1  | 1.1  |
| Multiracial                        |         |        |       |       |       |       |          | 4  | 4.5  |
| Other                              |         |        |       |       |       |       |          | 1  | 1.1  |
| White                              |         |        |       |       |       |       |          | 79 | 89.8 |
| <b>College graduate</b>            | 88      |        |       |       |       |       |          | 82 | 93.2 |
| <b>MCS D</b>                       | 93      | 4.71   | 2.83  | 0     | 12    | 0.18  | -0.82    |    |      |
| <b>FFMQ pre</b>                    | 96      | 118.39 | 20.27 | 65    | 177   | 0.21  | 0.23     |    |      |
| <b>FFMQ post</b>                   | 89      | 139.37 | 17.76 | 99    | 182   | 0.13  | 0.01     |    |      |
| <b>MAAS pre</b>                    | 96      | 52.25  | 12.93 | 22    | 88    | -0.03 | 0.04     |    |      |
| <b>MAAS post</b>                   | 89      | 61.67  | 11.15 | 23    | 85    | -0.44 | 0.60     |    |      |
| <b>DASS pre</b>                    | 96      | 24.86  | 18.05 | 0     | 88    | 0.94  | 0.52     |    |      |
| <b>DASS post</b>                   | 89      | 15.37  | 13.48 | 0     | 67    | 1.51  | 2.42     |    |      |
| <b>BCT pre</b>                     | 91      | 0.96   | 0.06  | 0.69  | 1     | -2.58 | 7.72     |    |      |
| <b>BCT post</b>                    | 85      | 0.97   | 0.03  | 0.85  | 1     | -1.81 | 3.26     |    |      |
| <b>PQM pre</b>                     | 93      | 66.3   | 16.95 | 29.43 | 100   | 0.01  | -0.76    |    |      |
| <b>PQM post</b>                    | 81      | 77.68  | 15.37 | 38.43 | 99.29 | -0.58 | -0.39    |    |      |
| <b>Single-item PQM ratings</b>     | 570     | 5.87   | 1.80  | 1     | 10    | -0.23 | -0.20    |    |      |
| <b>Single-item PQM count</b>       | 96      | 5.94   | 1.43  | 2     | 8     | -1.27 | 0.86     |    |      |
| <b>Single-item PQM slope</b>       | 96      | 0.12   | 0.12  | -0.25 | 0.35  | -0.76 | 0.72     |    |      |
| <b>Average daily formal mins</b>   | 96      | 27.87  | 11.81 | 0     | 60    | 0.08  | -0.29    |    |      |
| <b>Average daily informal mins</b> | 96      | 17.52  | 16.62 | 1.07  | 87    | 2.20  | 5.30     |    |      |
| <b>Average daily total mins</b>    | 96      | 45.38  | 21.66 | 8.75  | 147   | 1.59  | 4.72     |    |      |

Note: Valid *n* = non-missing *n*; *SD* = standard deviation; Min = minimum value; Max =

maximum value; MCS D = Marlow Crowne Social Desirability Scale – Short Form; FFMQ =

Five Facet Mindfulness Questionnaire; MAAS = Mindful Attention Awareness Scale; DASS =

Depression Anxiety and Stress Scales; BCT = Breath Counting Task accuracy; PQM = full

## PRACTICE QUALITY AS MECHANISM

Practice Quality – Mindfulness; Single-item PQM slope = random slopes extracted from longitudinal models of single-item PQM; mins = average daily practice time.

## PRACTICE QUALITY AS MECHANISM

Supplemental Materials Table 2. Multilevel model used to assess change in single-item practice quality scores over time

$$Y_{ij} = \beta_{00} + \beta_{10}(Time) + [U_{0j} + U_{1j}(Time) + e_{ij}] \quad (\text{Equation 1})$$

where  $Y_{ij}$  are single-item PQM ratings made by participant  $j$  at week  $i$ . The fixed intercept ( $\beta_{00}$ ) reflects the overall mean rating at baseline across all participants. The fixed slope ( $\beta_{10}$ ) reflects the overall mean change in single-item PQM scores per additional week of MBSR. The parameters inside the brackets represent random effects that could vary across participants. These included a random intercept ( $U_{0j}$ ) representing each participants' deviation from the overall intercept and a random slope ( $U_{1j}$ ) representing each participants' deviation from the fixed slope. Finally,  $e_{ij}$  reflects the residual error, unique for each participant at each time point. Models also included random intercepts (not displayed in Equation 1) to account for nesting of participants within instructors and groups.

## PRACTICE QUALITY AS MECHANISM

Supplemental Materials Table 3. Association between baseline variables

|         | 1      | 2       | 3       | 4      | 5   |
|---------|--------|---------|---------|--------|-----|
| 1. MCSD |        |         |         |        |     |
| 2. FFMQ | .29**  |         |         |        |     |
| 3. MAAS | .16    | .77***  |         |        |     |
| 4. DASS | -.29** | -.49*** | -.40*** |        |     |
| 5. BCT  | .01    | .03     | .02     | .02    |     |
| 6. PQM  | .42*** | .35***  | .33**   | -.27** | .14 |

Note: MCSD = Marlowe Crowne Social Desirability Scale – Short Form; FFMQ = Five Facet

Mindfulness Questionnaire; MAAS = Mindful Attention Awareness Scale; DASS = Depression

Anxiety and Stress Scales; BCT = Breath Counting Task; PQM = full seven-item Practice

Quality – Mindfulness. Values represent standardized regression coefficients ( $\beta$ ) from multilevel

models accounting for nesting of participants within MBSR groups and instructors. \* $p < .05$ , \*\* $p$

$< .01$ , \*\*\* $p < .001$ , <sup>t</sup> $p < .100$

## PRACTICE QUALITY AS MECHANISM

Supplemental Materials Table 4. Intraclass correlation coefficients at participant-, group-, and instructor-levels

| Variable                       | Participant | Group | Instructor |
|--------------------------------|-------------|-------|------------|
| MCSD                           |             | .00   | .00        |
| FFMQ pre                       |             | .00   | .01        |
| FFMQ post                      |             | .00   | .00        |
| MAAS pre                       |             | .00   | .00        |
| MAAS post                      |             | .00   | .00        |
| DASS pre                       |             | .00   | .00        |
| DASS post                      |             | .00   | .01        |
| BCT pre                        |             | .00   | .00        |
| BCT post                       |             | .00   | .00        |
| PQM pre                        |             | .01   | .00        |
| PQM post                       |             | .05   | .00        |
| Weekly single-item PQM ratings | .55         | .00   | .00        |
| Weekly formal mins             | .38         | .05   | .00        |
| Weekly informal mins           | .63         | .05   | .00        |
| Weekly total mins              | .60         | .00   | .00        |
| Single-item PQM slope          |             | .00   | .00        |
| Average daily formal mins      |             | .08   | .00        |
| Average daily informal mins    |             | .08   | .00        |
| Average daily total mins       |             | .02   | .00        |

Note: Participant-level intraclass correlation coefficients (*ICCs*) only available for measures collected weekly. Values indicate the proportion of variance associated with the particular level of nesting.

## PRACTICE QUALITY AS MECHANISM

Supplemental Materials Table 5. Results of multilevel model comparisons

| Model                        | Log-likelihood | $\chi^2$ | <i>df</i> | <i>p</i> |
|------------------------------|----------------|----------|-----------|----------|
| Empty                        | -1021.2        |          |           |          |
| Fixed effect only            | -1008.3        | 25.71    | 1         | < .001   |
| Fixed and random             | -1001.3        | 14.01    | 6         | 0.030    |
| Fixed, random, and quadratic | -1001.2        | 0.20     | 1         | 0.652    |

Note: Empty model = no fixed or random effects; subsequent models added fixed, random, and/or quadratic time effects.

## PRACTICE QUALITY AS MECHANISM

Supplemental Materials Table 6. Longitudinal model assessing changes in single-item PQM scores over time

| Random effects |           | Variance |  |  |  |  |
|----------------|-----------|----------|--|--|--|--|
| Participant    | Intercept | 1.81     |  |  |  |  |
|                | Week      | 0.034    |  |  |  |  |
| Class          | Intercept | 0.00     |  |  |  |  |
|                | Week      | 0.00     |  |  |  |  |
| Instructor     | Intercept | 0.00     |  |  |  |  |
|                | Week      | 0.00     |  |  |  |  |
| Residual       |           | 1.26     |  |  |  |  |

  

| Fixed effects | Estimate | <i>SE</i> | <i>df</i> | <i>t</i> | <i>p</i> |
|---------------|----------|-----------|-----------|----------|----------|
| Intercept     | 5.21     | 0.19      | 95.06     | 27.43    | < .001   |
| Week          | 0.12     | 0.03      | 86        | 4.01     | < .001   |

PRACTICE QUALITY AS MECHANISM

Supplemental Materials Table 7. Multilevel mediation model sensitivity analyses

| Outcome | Predictor | Mediator | Primary | Raw mins | Formal mins | MCSD  | Bootstrapped      |
|---------|-----------|----------|---------|----------|-------------|-------|-------------------|
| FFMQ    | Time      | Qual     | .14***  | .14***   | .20***      | .13** | .13**             |
| MAAS    | Time      | Qual     | .12***  | .12**    | .10**       | .11** | .12**             |
| DASS    | Time      | Qual     | -.06    | -.08*    | -.08*       | -.05  | -.06 <sup>t</sup> |
| BCT     | Time      | Qual     | -.02    | -.05     | .00         | -.02  | -.02              |

Note: All values represent average causal mediation effect (ACME; Tingley et al., 2014) with

changes in practice quality mediating the link between practice time and outcome; Primary = primary model including total practice time with unlikely practice time values (i.e., daily formal or informal practice > 120 minutes) removed; Raw mins = model with unlikely practice time values retained; Formal mins = model with only formal practice time included (i.e., without informal practice time); MCSD = model controlling for social desirability (Marlow Crowne Social Desirability Scale – Short Form); Bootstrapped = model using nonparametric bootstrapped confidence intervals (not accounting for instructor and group due to inability to derive bootstrapped confidence intervals within multilevel mediation in R); FFMQ = Five Facet Mindfulness Questionnaire; MAAS = Mindful Attention Awareness Scale; DASS = Depression Anxiety and Stress Scales; BCT = Breath Counting Task; Time = practice time; Qual = changes in single-item Practice Quality – Mindfulness (PQM) as random slopes extracted from longitudinal models. Sample sizes for mediation models are  $n = 89$  for FFMQ, MAAS, and DASS and  $n = 82$  for BCT.  $*p < .05$ ,  $**p < .01$ ,  $***p < .001$ , <sup>t</sup> $p < .100$



## PRACTICE QUALITY AS MECHANISM

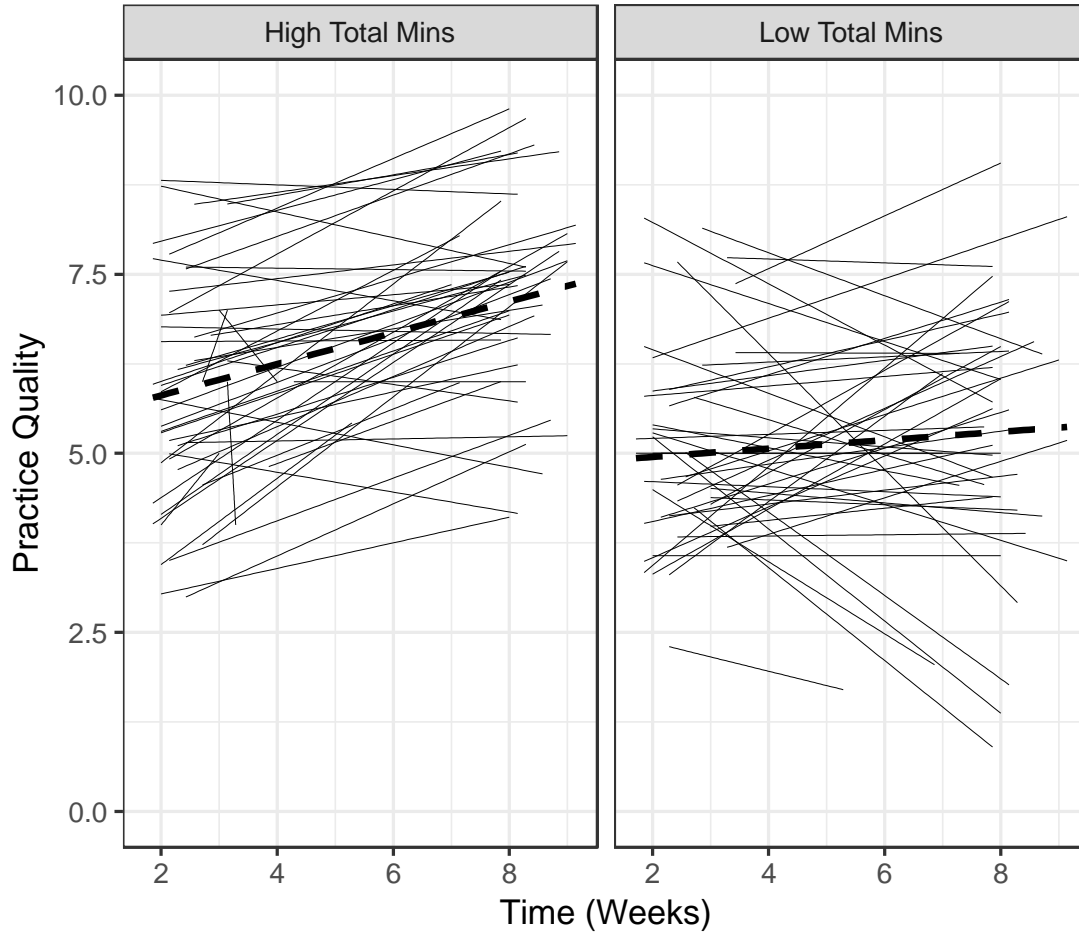

Supplemental Materials Figure 1. Practice time predicts improvement in practice quality over the course of mindfulness-based stress reduction (MBSR). Regression lines represent within-participant change in single-item Practice Quality – Mindfulness (PQM) scores over the course of MBSR. Plots display the significant cross-level interaction between average daily practice time and week ( $p < .001$ ). A median split was used to separate those with high practice time (High Total Mins) and low practice time (Low Total Mins) for display purposes only.
